# Supplementary material for: The Selective α1 Antagonist Tamsulosin Alters ECM Distributions and Cellular Metabolic Functions of ARPE 19 Cells in a Concentration-Dependent Manner
Source: MDPI journal article supplement (doi:10.3390/bioengineering9100556), 2022-10-14
Supplement: s1 [file s1]

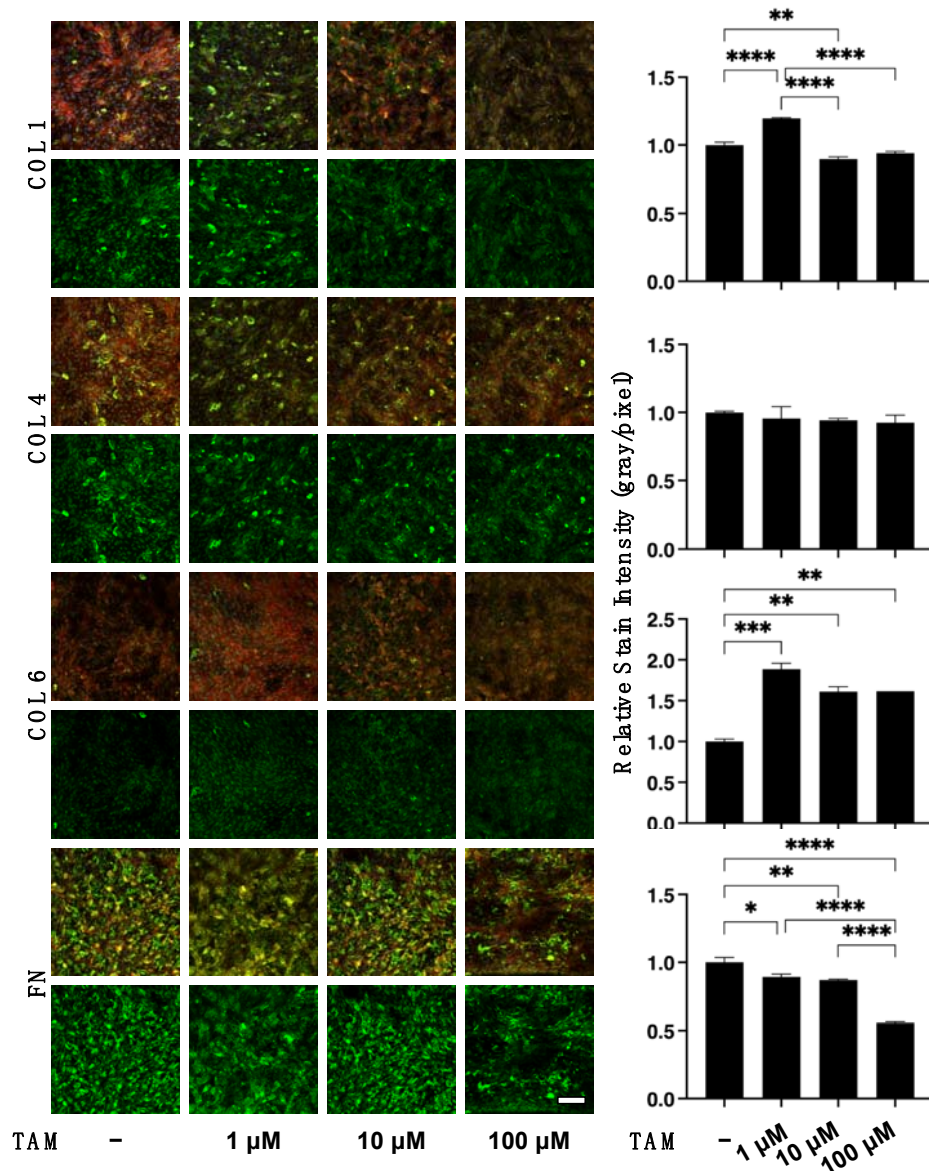

Figure S1: Representative confocal images showing the expression of ECMs in 2D ARPE19 monolayers under several conditions.

2D ARPE 19 monolayers at Day 5 in the absence or presence of 1 mM, 10 mM or 100 mM tamsulosin (TAM) were subjected to immunohistochemistry analyses. Representative immunolabeling images by specific antibodies against collagen 1 (COL 1), collagen 4 (COL 4), collagen 6 (COL6), or fibronectin (FN) (green), DAPI (blue) and Phalloidin (red) are shown in panel A (scale bar: 100  $\mu$ m). The staining intensities of the labeling of each ECM protein were plotted in panel B. All experiments were performed in duplicate using fresh preparations consisting of 5 spheroids each. Data are presented as the arithmetic mean  $\pm$  standard error of the mean (SEM). \*  $P < 0.05$ , \*\*  $P < 0.01$ , \*\*\*  $P < 0.005$ , \*\*\*\*  $P < 0.001$  (ANOVA followed by a Tukey's multiple comparison test).

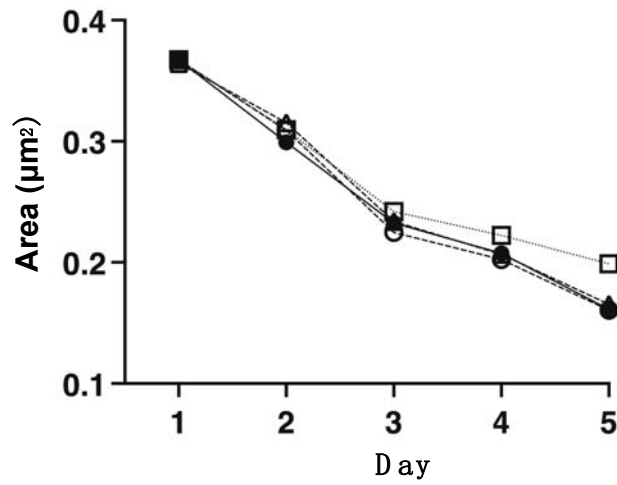

Figure S2: Time course of changes in the mean sizes of the 3D ARPE 19 spheroids during 5 days culture.

The fluctuation in the mean sizes of the 3D ARPE19 spheroids of non-treated controls (CONT), or in the presence of 1 mM, 10 mM or 100 mM tamsulosin (TAM) during 5 days spheroid culture are plotted.

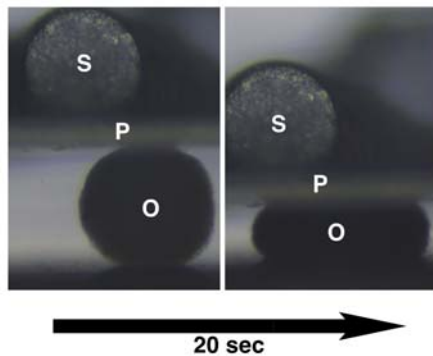

Figure S3: The measurement of the physical stiffness using a microsqueezer.

A single living 3D ARPE19 spheroid at Day 5 was compressed and the force ( $\mu\text{N}$ ) required to induce a 50 % deformity of every single spheroid out of 15-20 freshly prepared 3D spheroids were measured over a period of 20 seconds (panel A, O; 3D spheroid, P; compressing plate, S; pressure sensor).

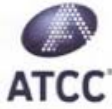

## CERTIFICATE OF ANALYSIS

ATCC® Number: CRL-2302™  
Lot Number: 70013110  
Name: ARPE-19  
Description: Retinal Epithelium  
Species: Human (*Homo sapiens*)  
Volume/Ampule: Approximately 1 mL  
Date Frozen: 15MAR2018  
Recovery: A T-75 setup at a dilution of 1:15 reaches approximately 20% confluence in 1 day and 80% confluence in 4 days.  
Product Format: Cells cryopreserved in the appropriate cryopreservation medium  
Expiration Date: Not applicable  
Storage Conditions: Vapor phase of liquid nitrogen

0.05% / 1:1000

| Test / Method                                                                                                               | Specification                                   | Result                                          |
|-----------------------------------------------------------------------------------------------------------------------------|-------------------------------------------------|-------------------------------------------------|
| Ampule passage number                                                                                                       | Report results                                  | 20                                              |
| Population doubling level (PDL)                                                                                             | Report results                                  | Not applicable                                  |
| Total cells/ampoule<br>(Cell count using Trypan Blue stain method)                                                          | Report results                                  | $7.6 \times 10^5$ total cells/ampoule           |
| Post-freeze viability<br>(Cell count using Trypan Blue stain method)                                                        | $\geq 50.0\%$                                   | 95.2%                                           |
| Growth properties<br>(Visual observation method)                                                                            | Adherent                                        | Adherent                                        |
| Morphology<br>(Visual observation method)                                                                                   | Epithelial-like*                                | Epithelial-like                                 |
| Test for mycoplasma contamination<br>Hoechst DNA stain (indirect) method<br>Agar culture (direct) method<br>PCR-based assay | None detected<br>None detected<br>None detected | None detected<br>None detected<br>None detected |
| Species determination: COI assay (interspecies)                                                                             | Human                                           | Human                                           |

ATCC  
10801 University Boulevard  
Manassas, VA 20110-2209 USA  
www.atcc.org

800-638-6597 or 703-365-2700  
Fax: 703-365-2750  
E-mail: tech@atcc.org  
or contact your local distributor

- Page 1 of 2 -

Template Doc ID: 31194

Template Revision: 5

Template Effective Date: 10/16/2017

Table S1: The Quantitative PCR primers
